# Supplementary material for: DNA methylation and chromatin accessibility profiling of mouse and human fetal germ cells
Source: PubMed Central journal article supplement (PMC5339845; doi:10.1038/cr.2016.128), 2016-11-08
Supplement: cr2016128x4.pdf [file cr2016128x4.pdf]

**Figure S1****A****Chromatin Accessibility and Endogenous DNA Methylation on Promoter Regions (Mouse)**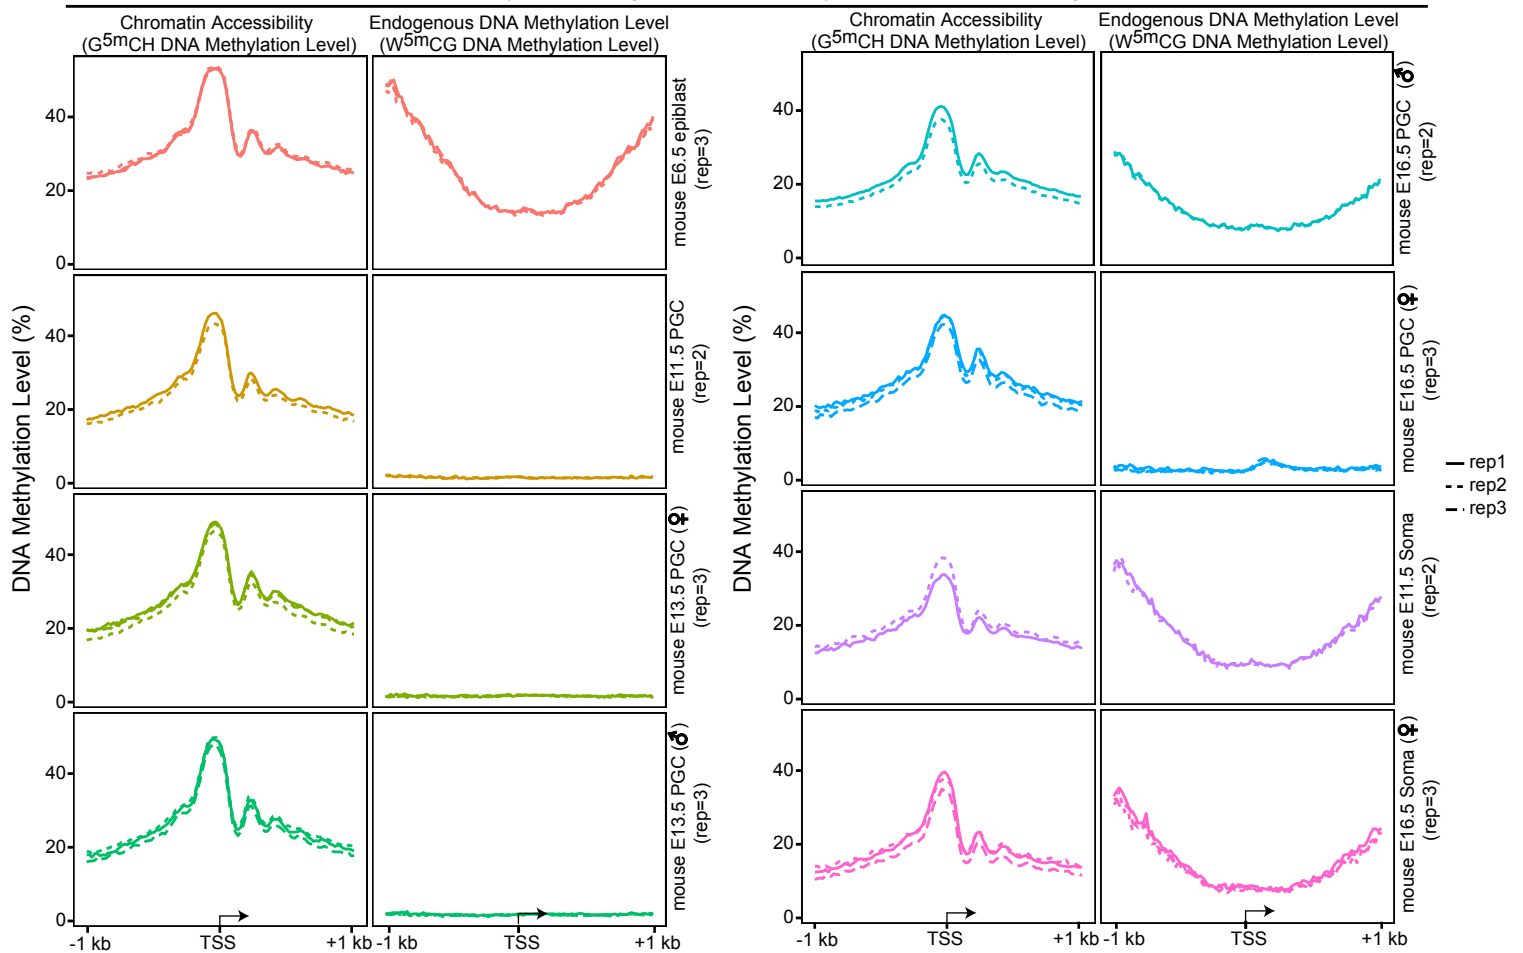**B****Chromatin Accessibility and DNA Methylation on Genebody Regions (Mouse)**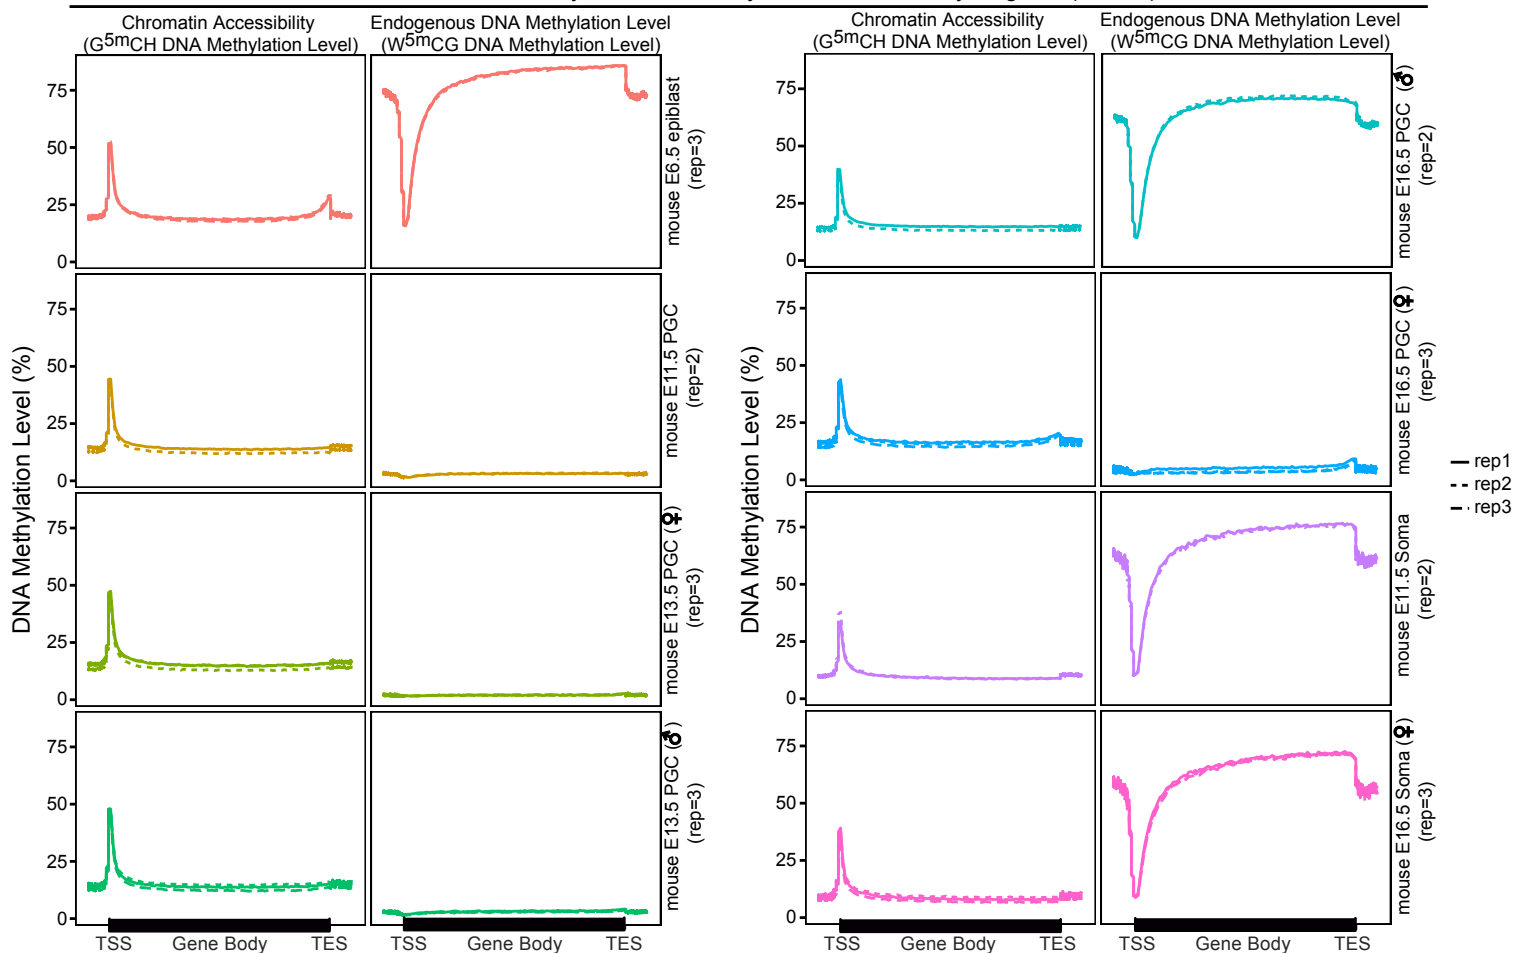

**Figure S1 Reproducibility of the NOMe-seq data of mouse germline.**

(A) The reproducible patterns of chromatin accessibility and endogenous DNA methylation on promoter regions across replicates. (B) The reproducible patterns of chromatin accessibility and endogenous DNA methylation on gene body regions across replicates.
