# Supplementary material for: DNA methylation and chromatin accessibility profiling of mouse and human fetal germ cells
Source: PubMed Central journal article supplement (PMC5339845; doi:10.1038/cr.2016.128), 2016-11-08
Supplement: cr2016128x6.pdf [file cr2016128x6.pdf]

Figure S3

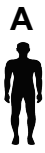

Human Samples

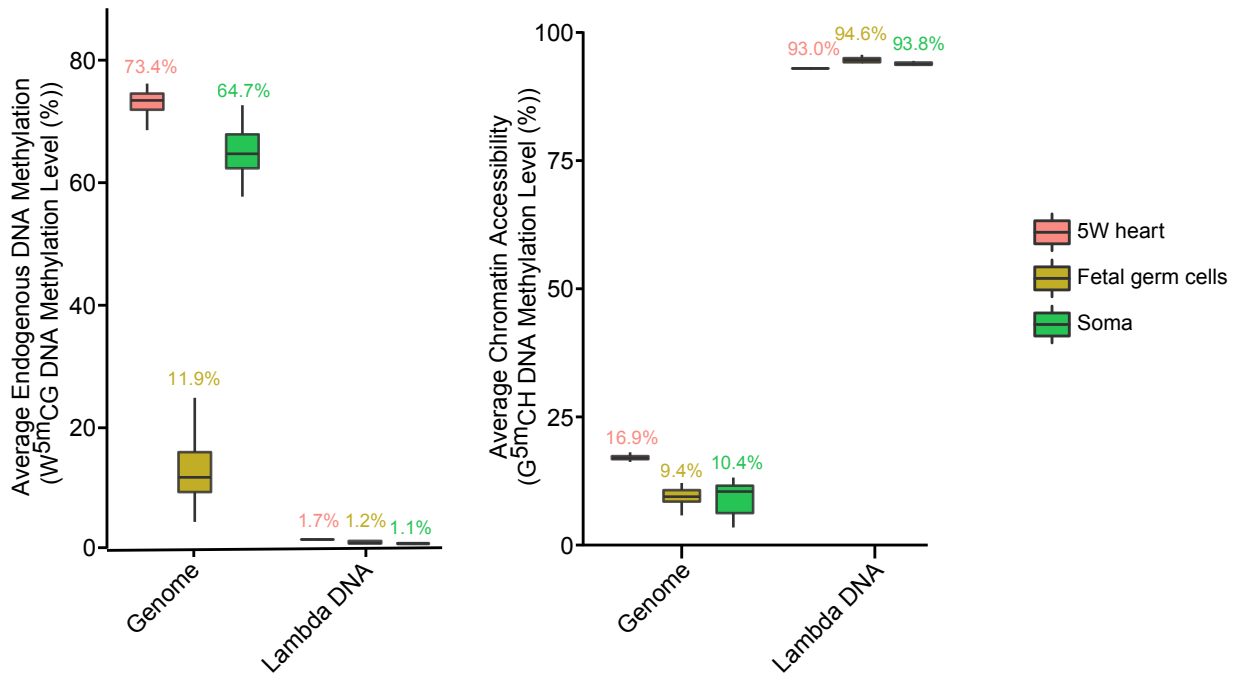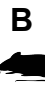

Mouse Samples

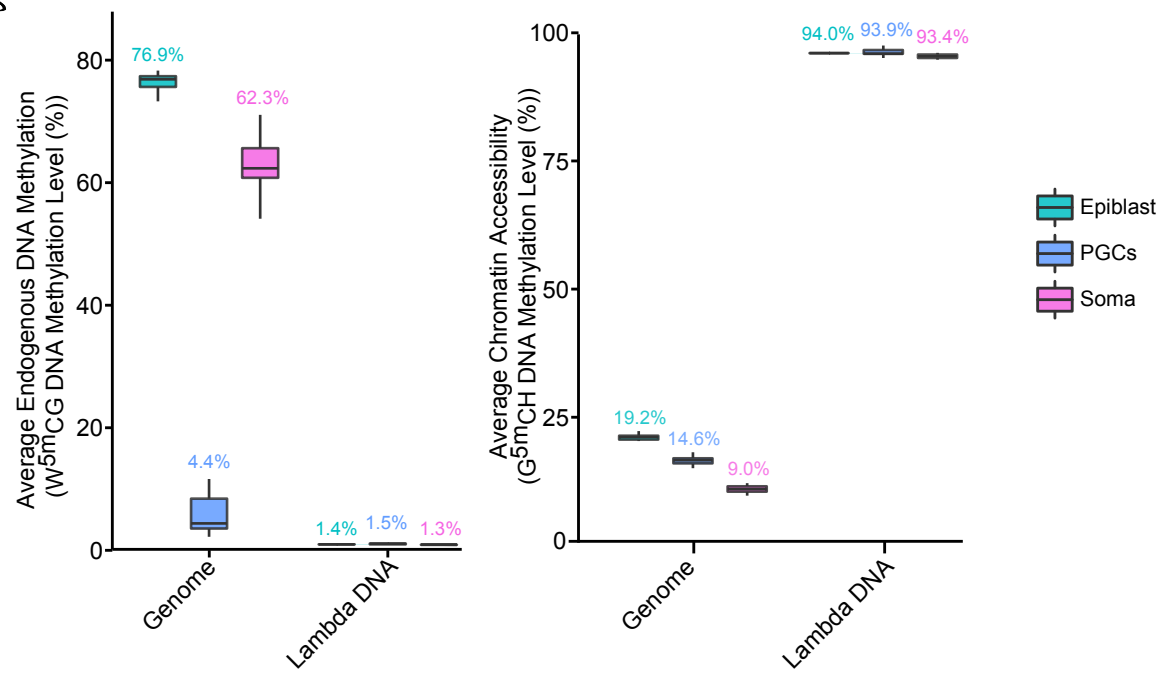

**Figure S3 The *in vitro* methylation efficiency of M.CviPI GpC methyltransferase and bisulfite conversion rate of the NOME-seq.**

Both the *in vitro* methylation efficiency of M.CviPI GpC methyltransferase and bisulfite conversion rate are estimated based on the methylation level the GCH sites and WCG sites of the unmethylated lambda DNA spike-ins.
