# Supplementary material for: DNA methylation and chromatin accessibility profiling of mouse and human fetal germ cells
Source: PubMed Central journal article supplement (PMC5339845; doi:10.1038/cr.2016.128), 2016-11-08
Supplement: cr2016128x7.pdf [file cr2016128x7.pdf]

**Figure S4**

**A**

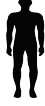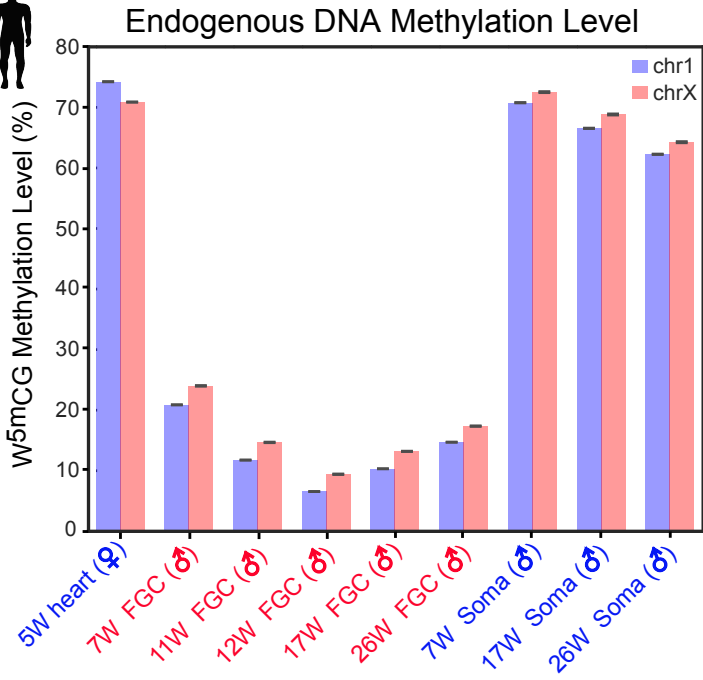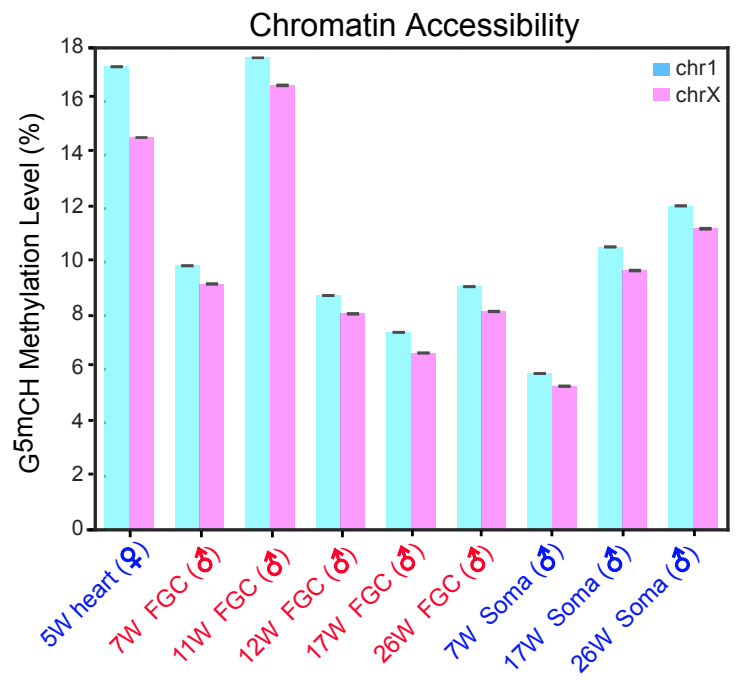

**B**

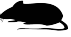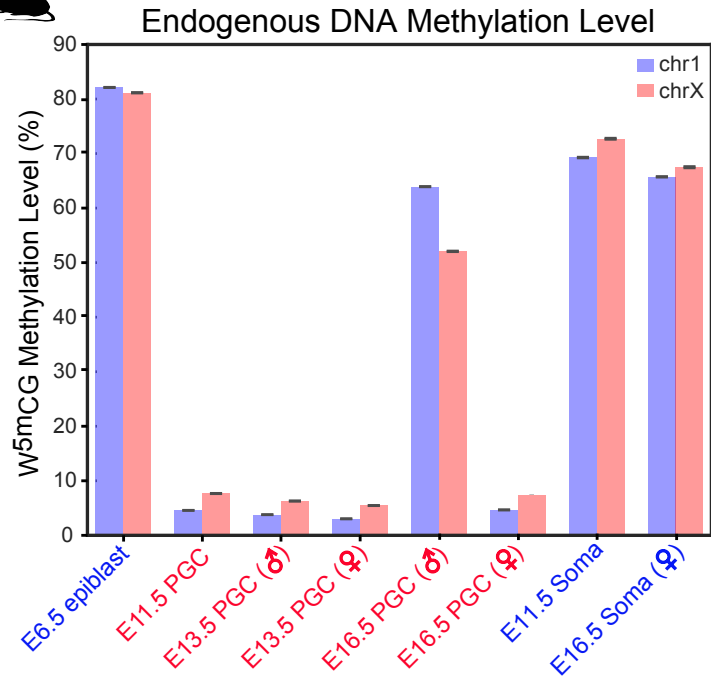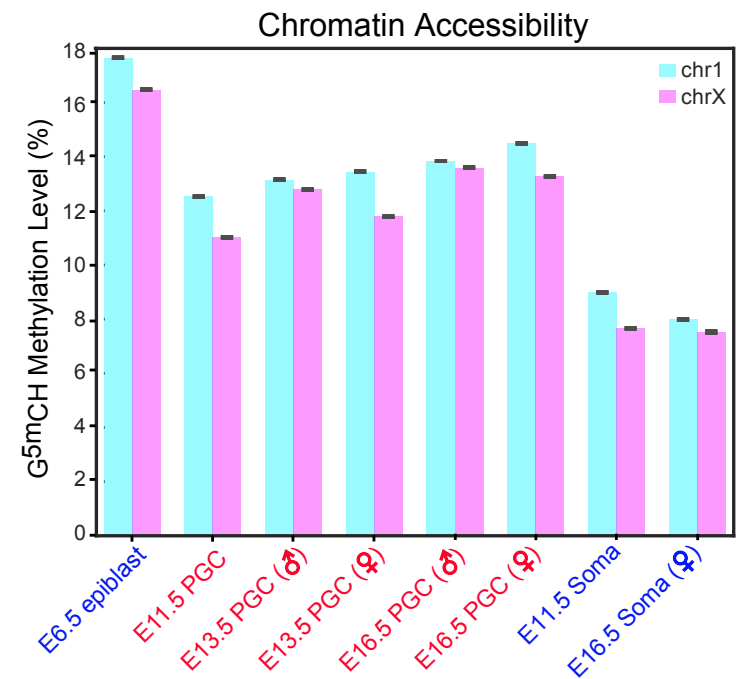

**Figure S4 The endogenous DNA methylation and chromatin accessibility dynamics of the sex chromosome in mammalian germ cells.**

Barplots showing the endogenous DNA methylation and chromatin accessibility dynamics of chromosome X (chrX) and chromosome 1 (chr1) during mammalian germ cell development.
