# Supplementary material for: DNA methylation and chromatin accessibility profiling of mouse and human fetal germ cells
Source: PubMed Central journal article supplement (PMC5339845; doi:10.1038/cr.2016.128), 2016-11-08
Supplement: cr2016128x8.pdf [file cr2016128x8.pdf]

**Figure S5****A**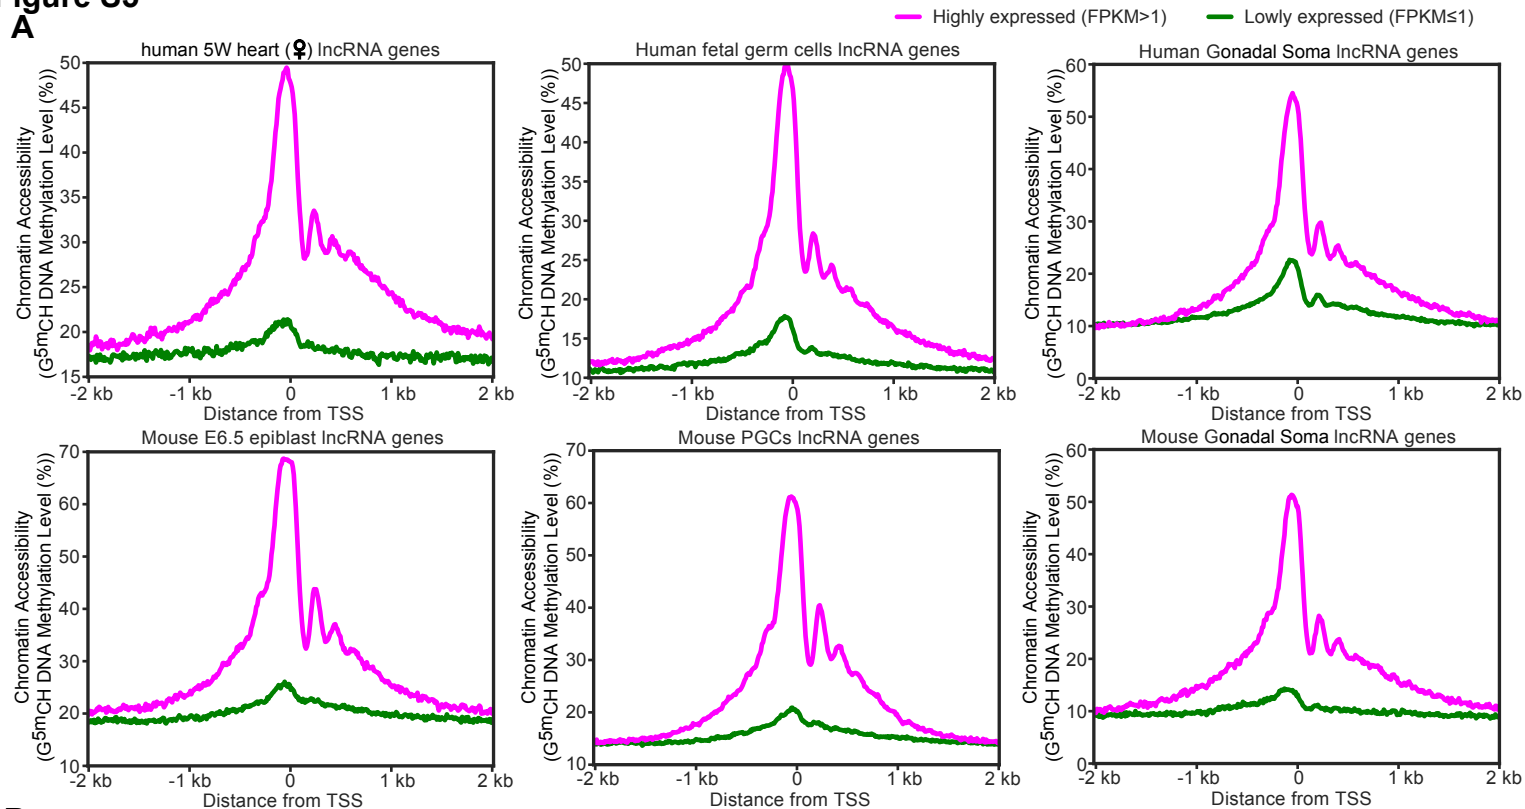**B**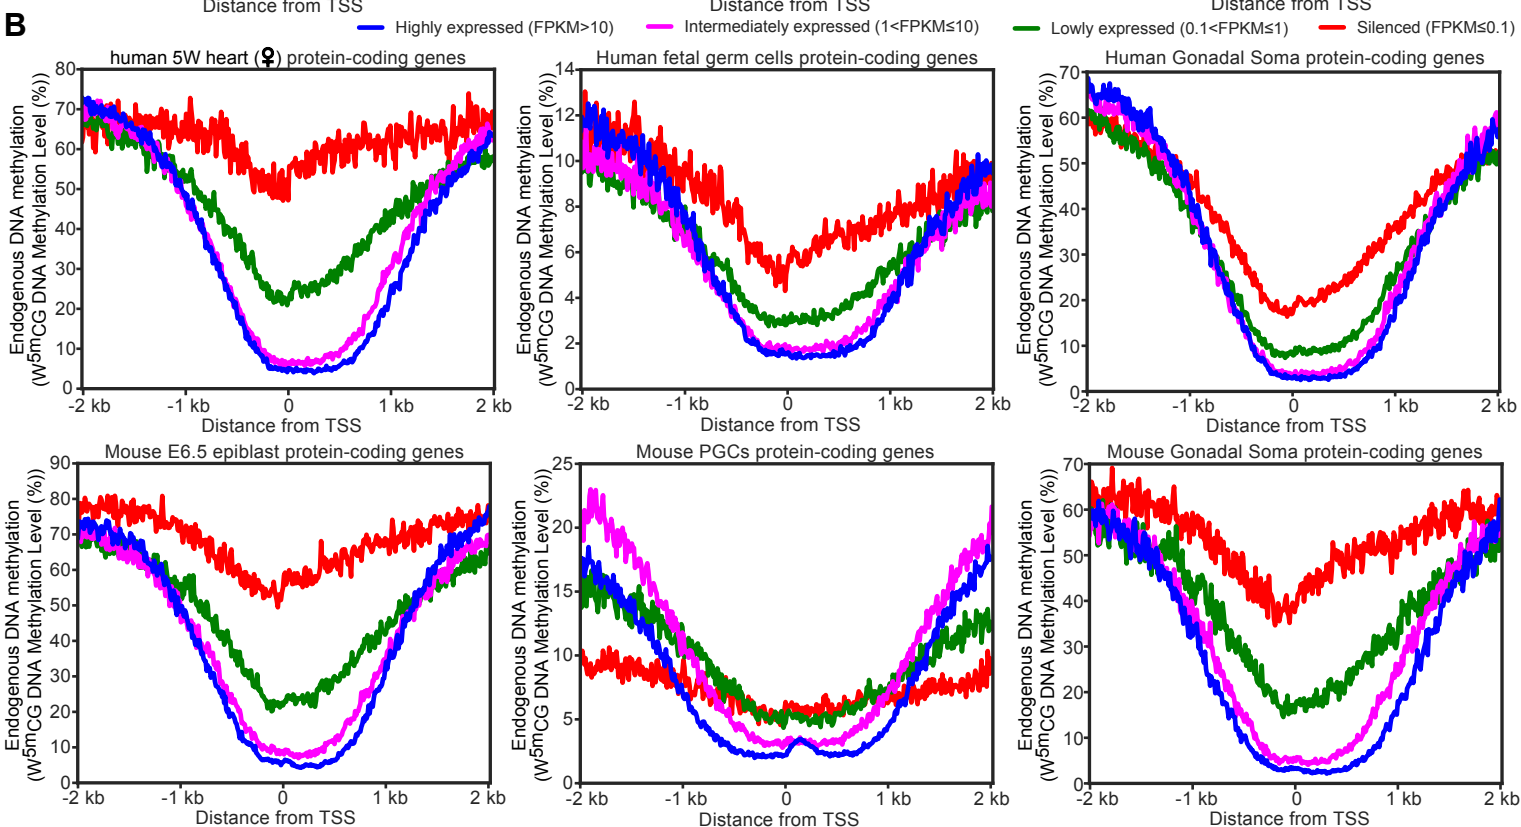**C**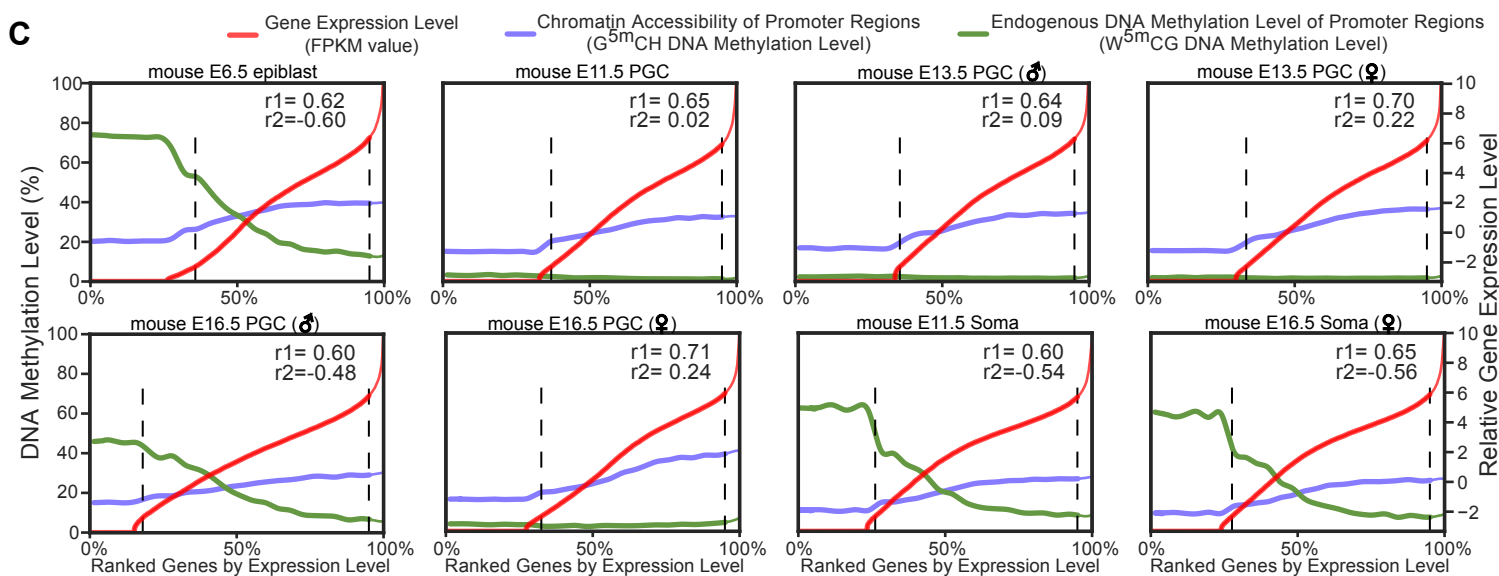

**Figure S5 The relationships among chromatin accessibility, endogenous DNA methylation and gene expression of single copy gene.**

(A) The relationship between the chromatin accessibility of the promoter regions and the corresponding lncRNA expression in human and mouse samples. LncRNAs were classified into two groups according to their expression levels. (B) The anti-correlation between the endogenous DNA methylation of the promoter regions and the corresponding RefSeq genes expression in human and mouse samples. (C) The Spearman correlation ( $r_1$ ) between the gene expression level (red) and chromatin accessibility of the promoter regions (lightblue) and the Spearman correlation ( $r_2$ ) between the gene expression level (red) and endogenous DNA methylation level of the promoter regions (green) in mouse PGCs and Soma.
