# Supplementary material for: DNA methylation and chromatin accessibility profiling of mouse and human fetal germ cells
Source: PubMed Central journal article supplement (PMC5339845; doi:10.1038/cr.2016.128), 2016-11-08
Supplement: cr2016128x9.pdf [file cr2016128x9.pdf]

**Figure S6** PCA clustering of Chromatin Accessibility of human distal NDRs (G<sup>5m</sup>CH DNA Methylation Level) **A** PCA clustering of Chromatin Accessibility of human proximal NDRs (G<sup>5m</sup>CH DNA Methylation Level) **B** PCA clustering of Chromatin Accessibility of mouse distal NDRs (G<sup>5m</sup>CH DNA Methylation Level) **C** PCA clustering of Chromatin Accessibility of mouse proximal NDRs (G<sup>5m</sup>CH DNA Methylation Level) **D** MDS analysis of Chromatin Accessibility of distal NDRs (G<sup>5m</sup>CH DNA Methylation Level) **E**

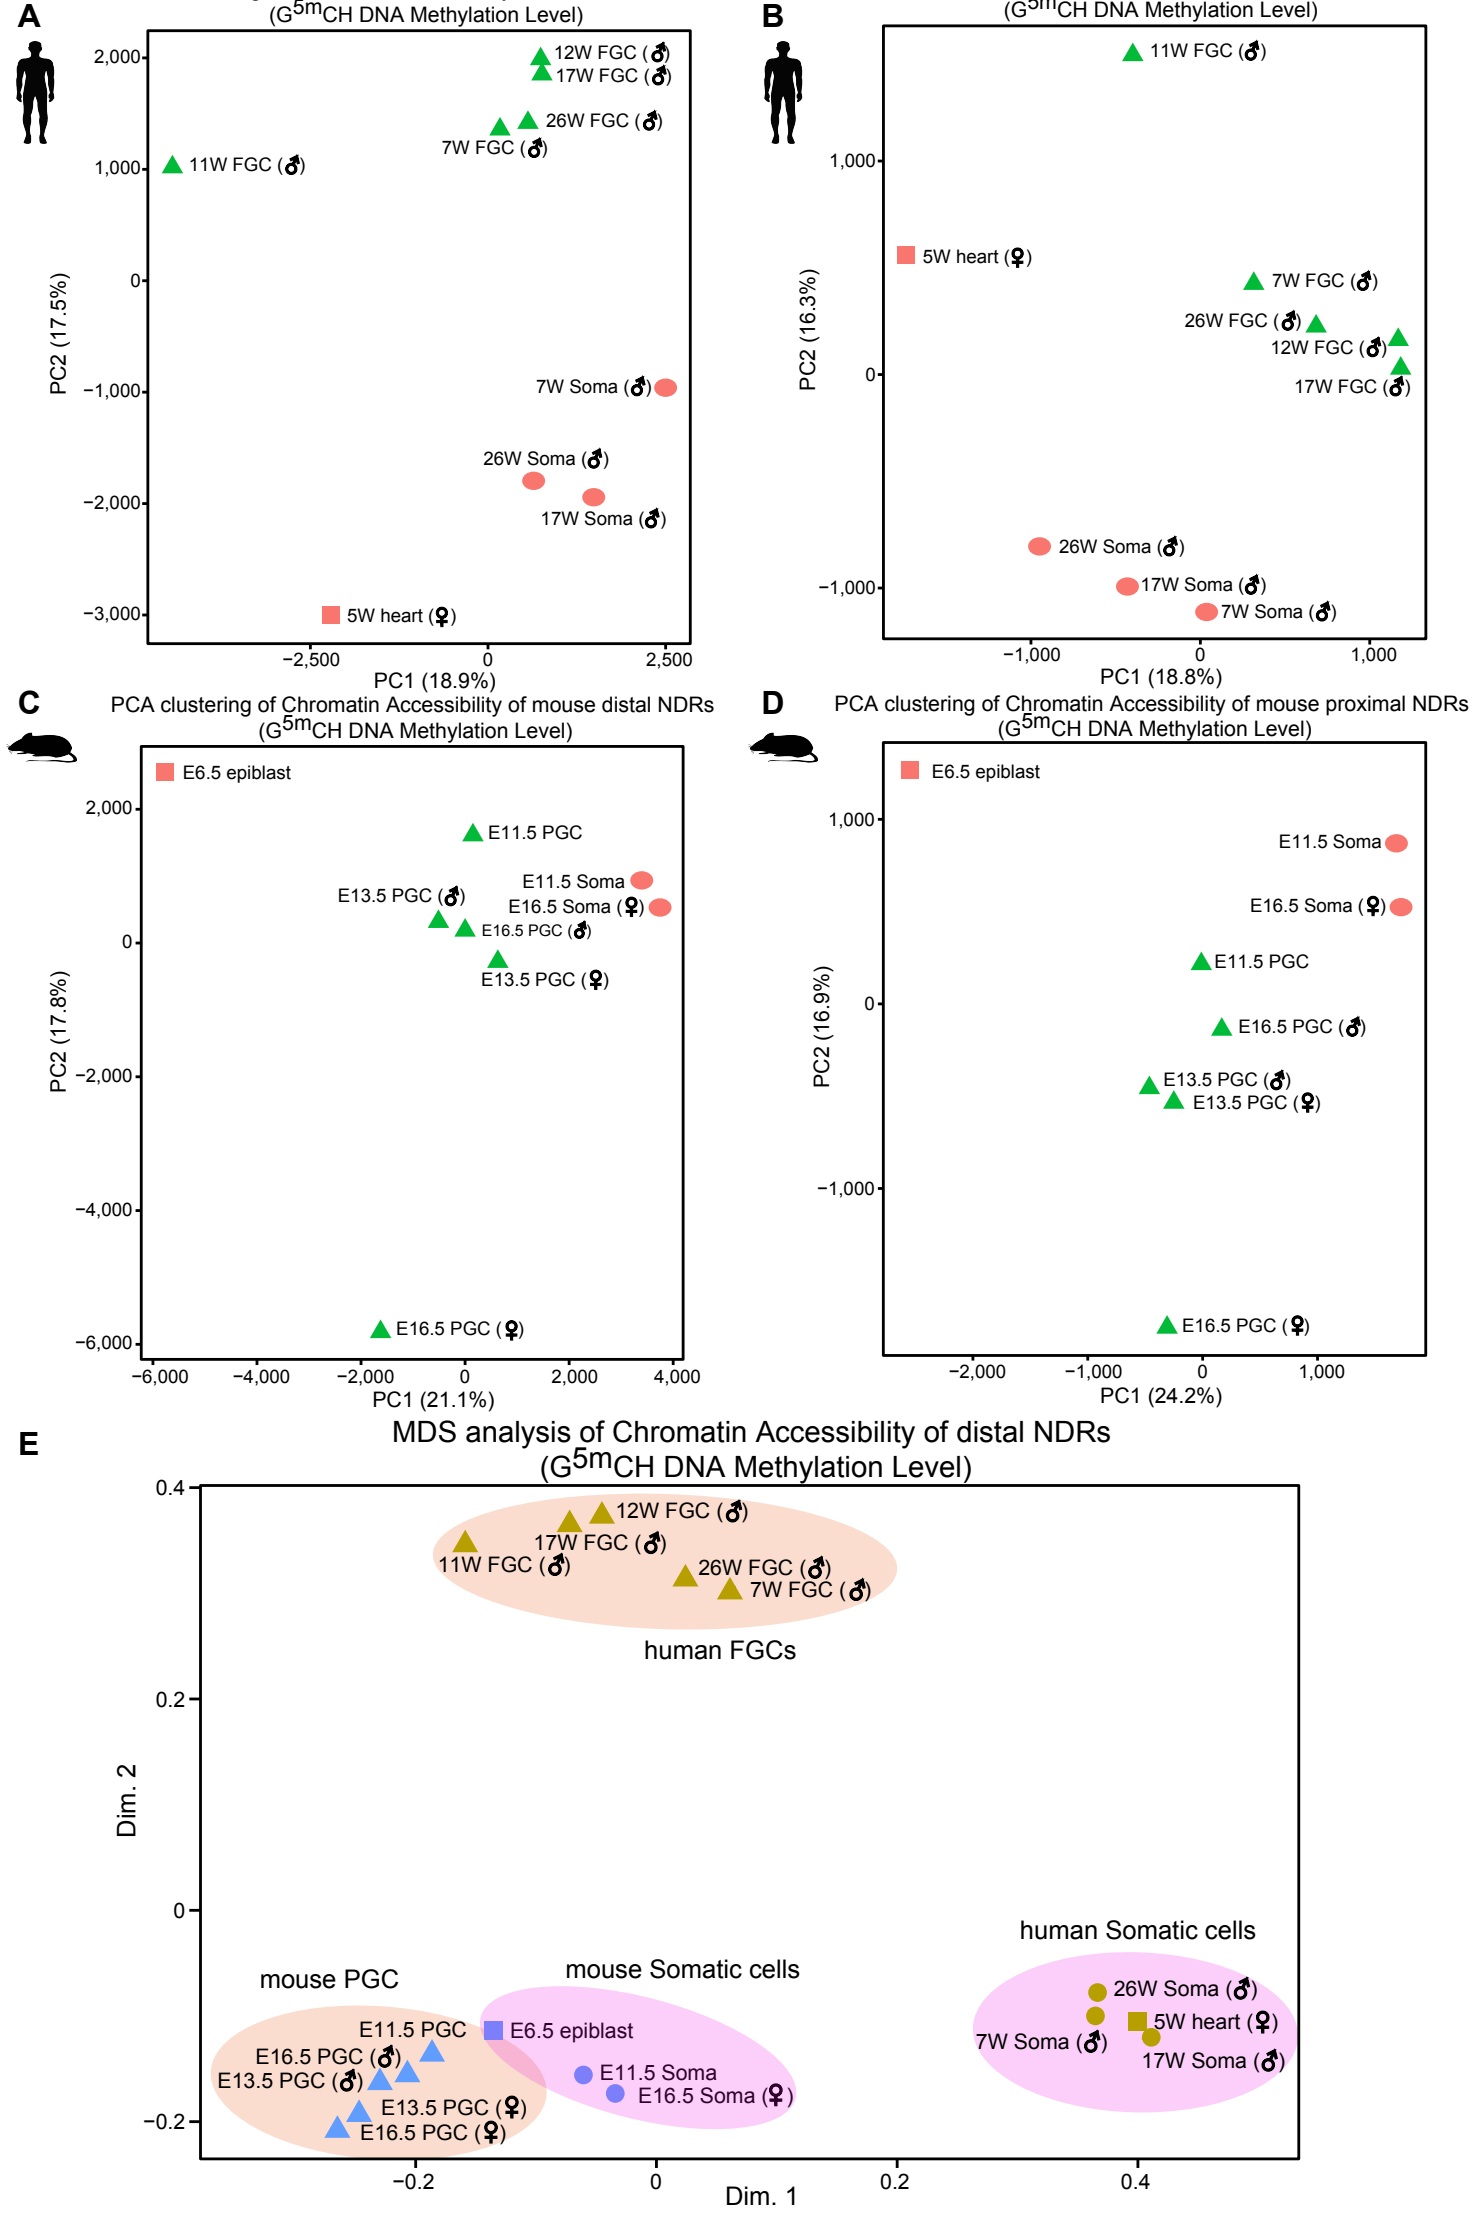

**Figure S6 The clustering analysis of accessibility of the NDRs in mammalian PGCs.**

(A-D) PCA clustering of the distal (panel A and C) and proximal (panel B and D) NDRs based on the chromatin accessibilities in human (panel A and B) and mouse (panel C and D) samples. (E) The MDS analysis of chromatin accessibility of the distal NDRs of human-to-mouse homologous regions.
