# Supplementary material for: DNA methylation and chromatin accessibility profiling of mouse and human fetal germ cells
Source: PubMed Central journal article supplement (PMC5339845; doi:10.1038/cr.2016.128), 2016-11-08
Supplement: cr2016128x10.pdf [file cr2016128x10.pdf]

**Figure S7**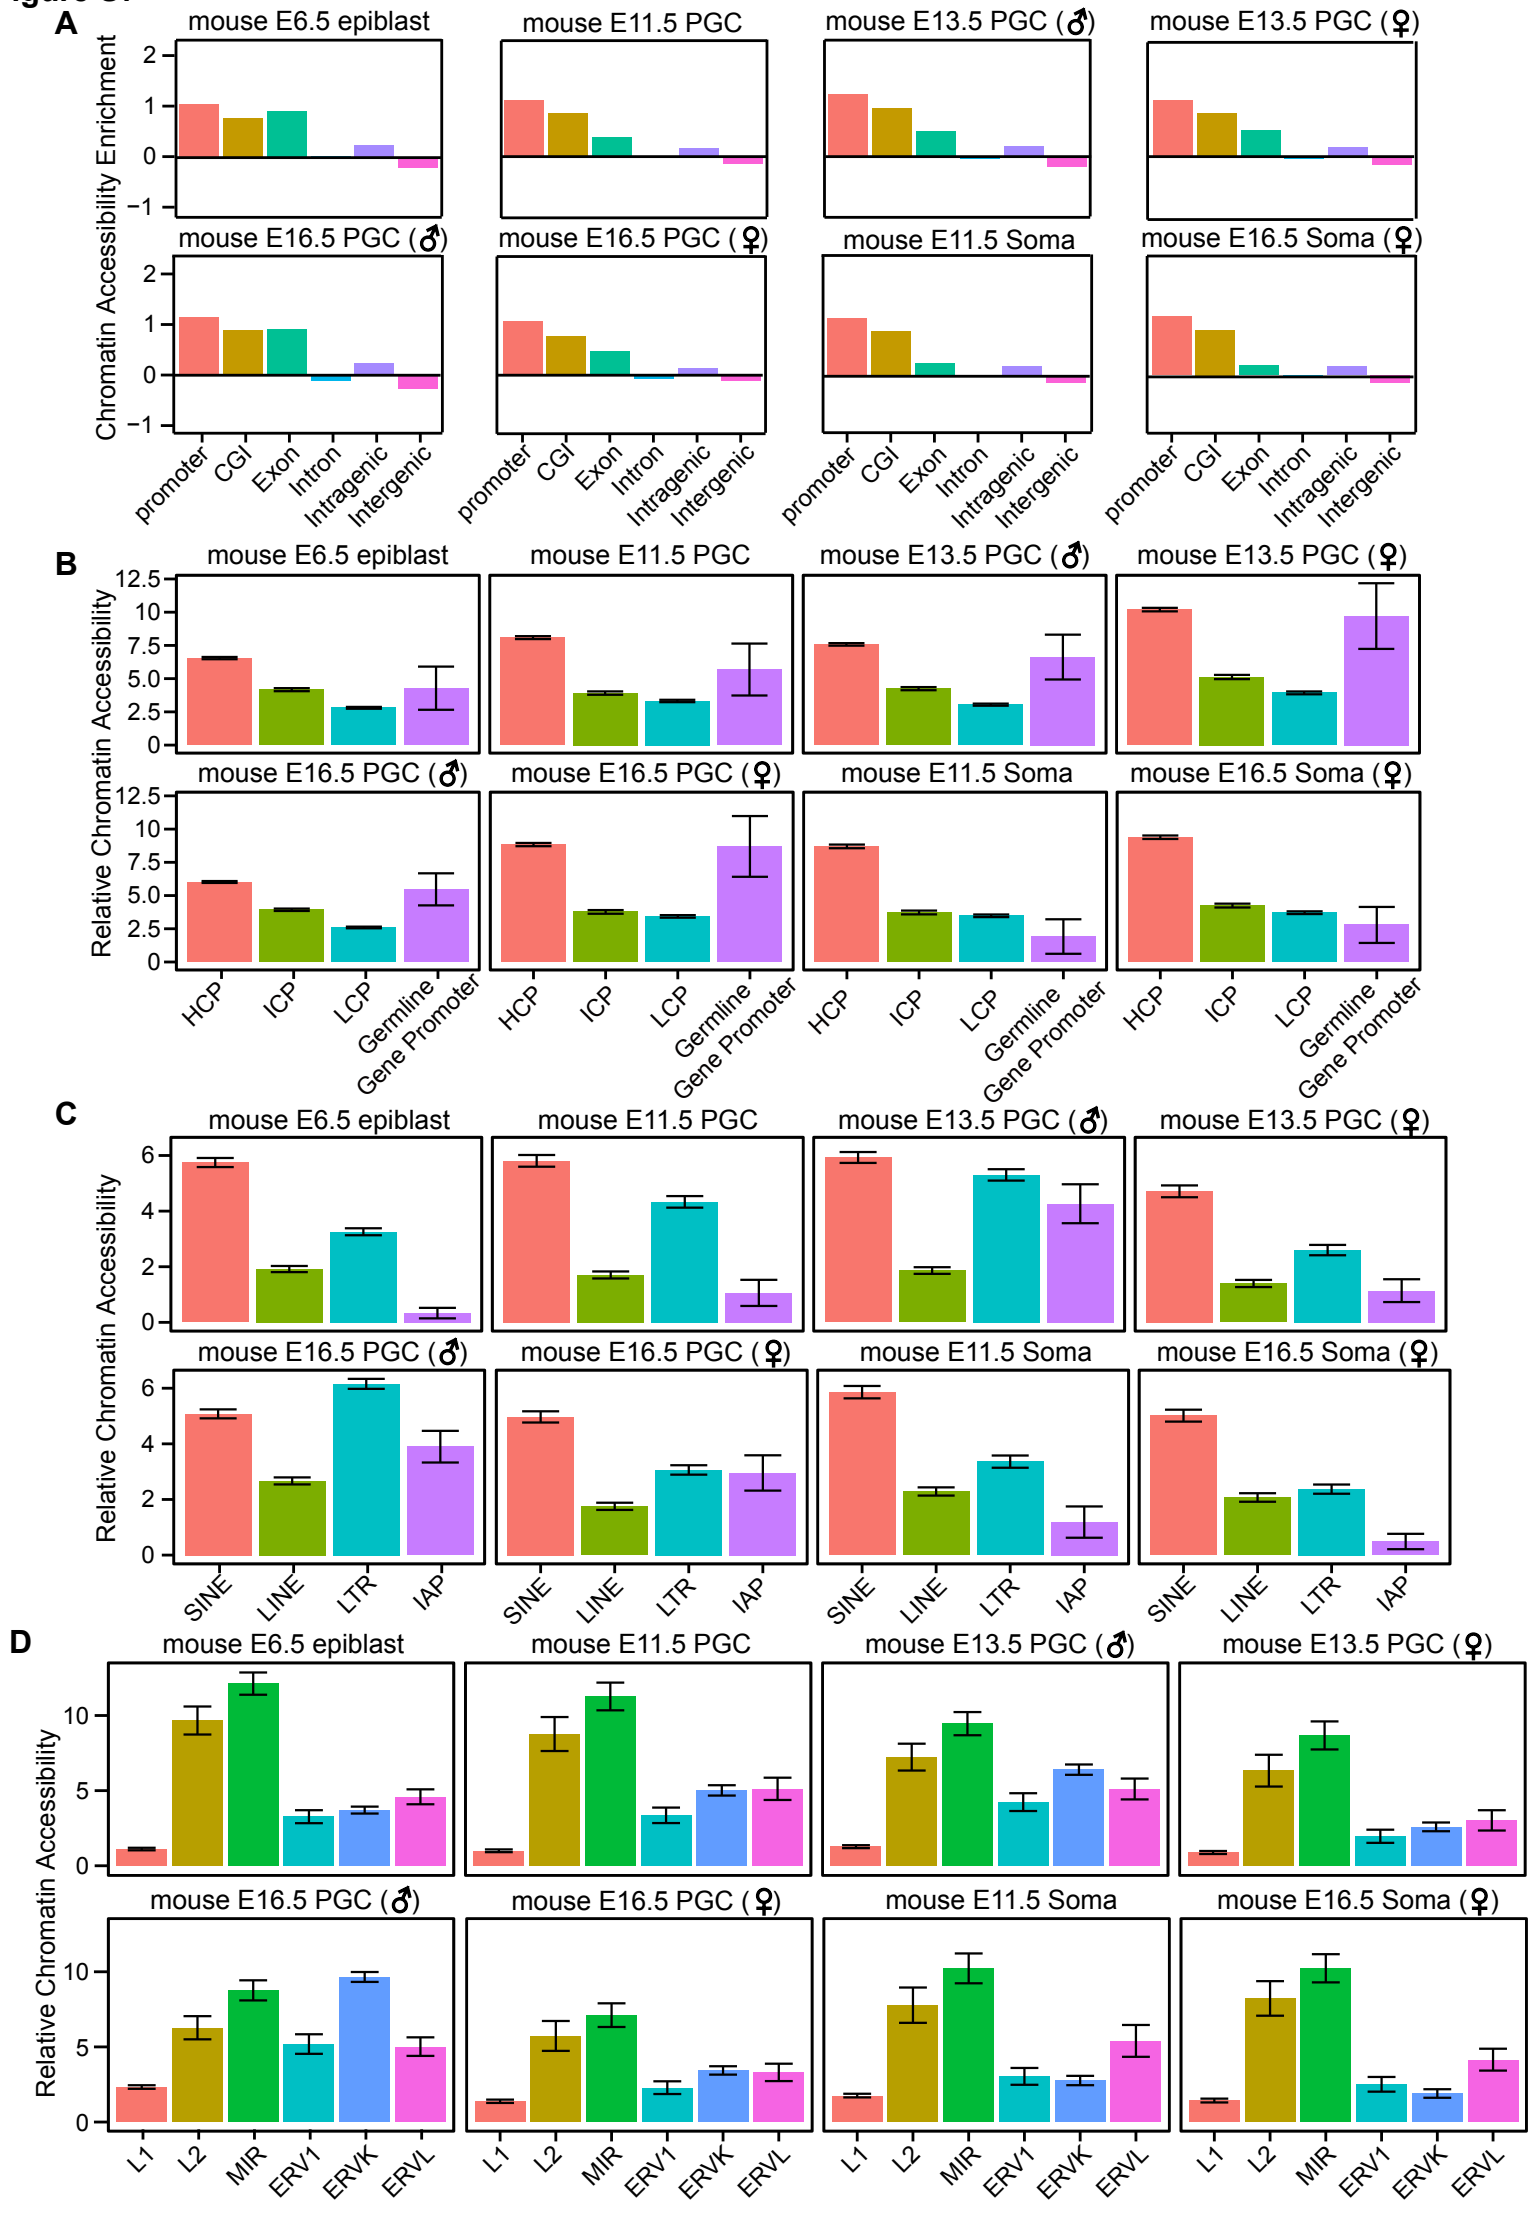

**Figure S7 Chromatin accessibility at annotated elements and repetitive elements in mouse.**

(A) The relative enrichment analysis of the chromatin accessibility of the genomic regions in mouse. (B) The chromatin accessibility of the high-density CpG promoter (HCP), intermediate-density CpG promoter (ICP), low-density CpG promoter (LCP) and promoter of germline specific genes in mouse germline. (C-D) The chromatin accessibility at the repetitive elements (panel C) and their subfamilies (panel D) with different evolutionary ages in mouse germline.
