# Supplementary material for: DNA methylation and chromatin accessibility profiling of mouse and human fetal germ cells
Source: PubMed Central journal article supplement (PMC5339845; doi:10.1038/cr.2016.128), 2016-11-08
Supplement: cr2016128x11.pdf [file cr2016128x11.pdf]

**Figure S8**

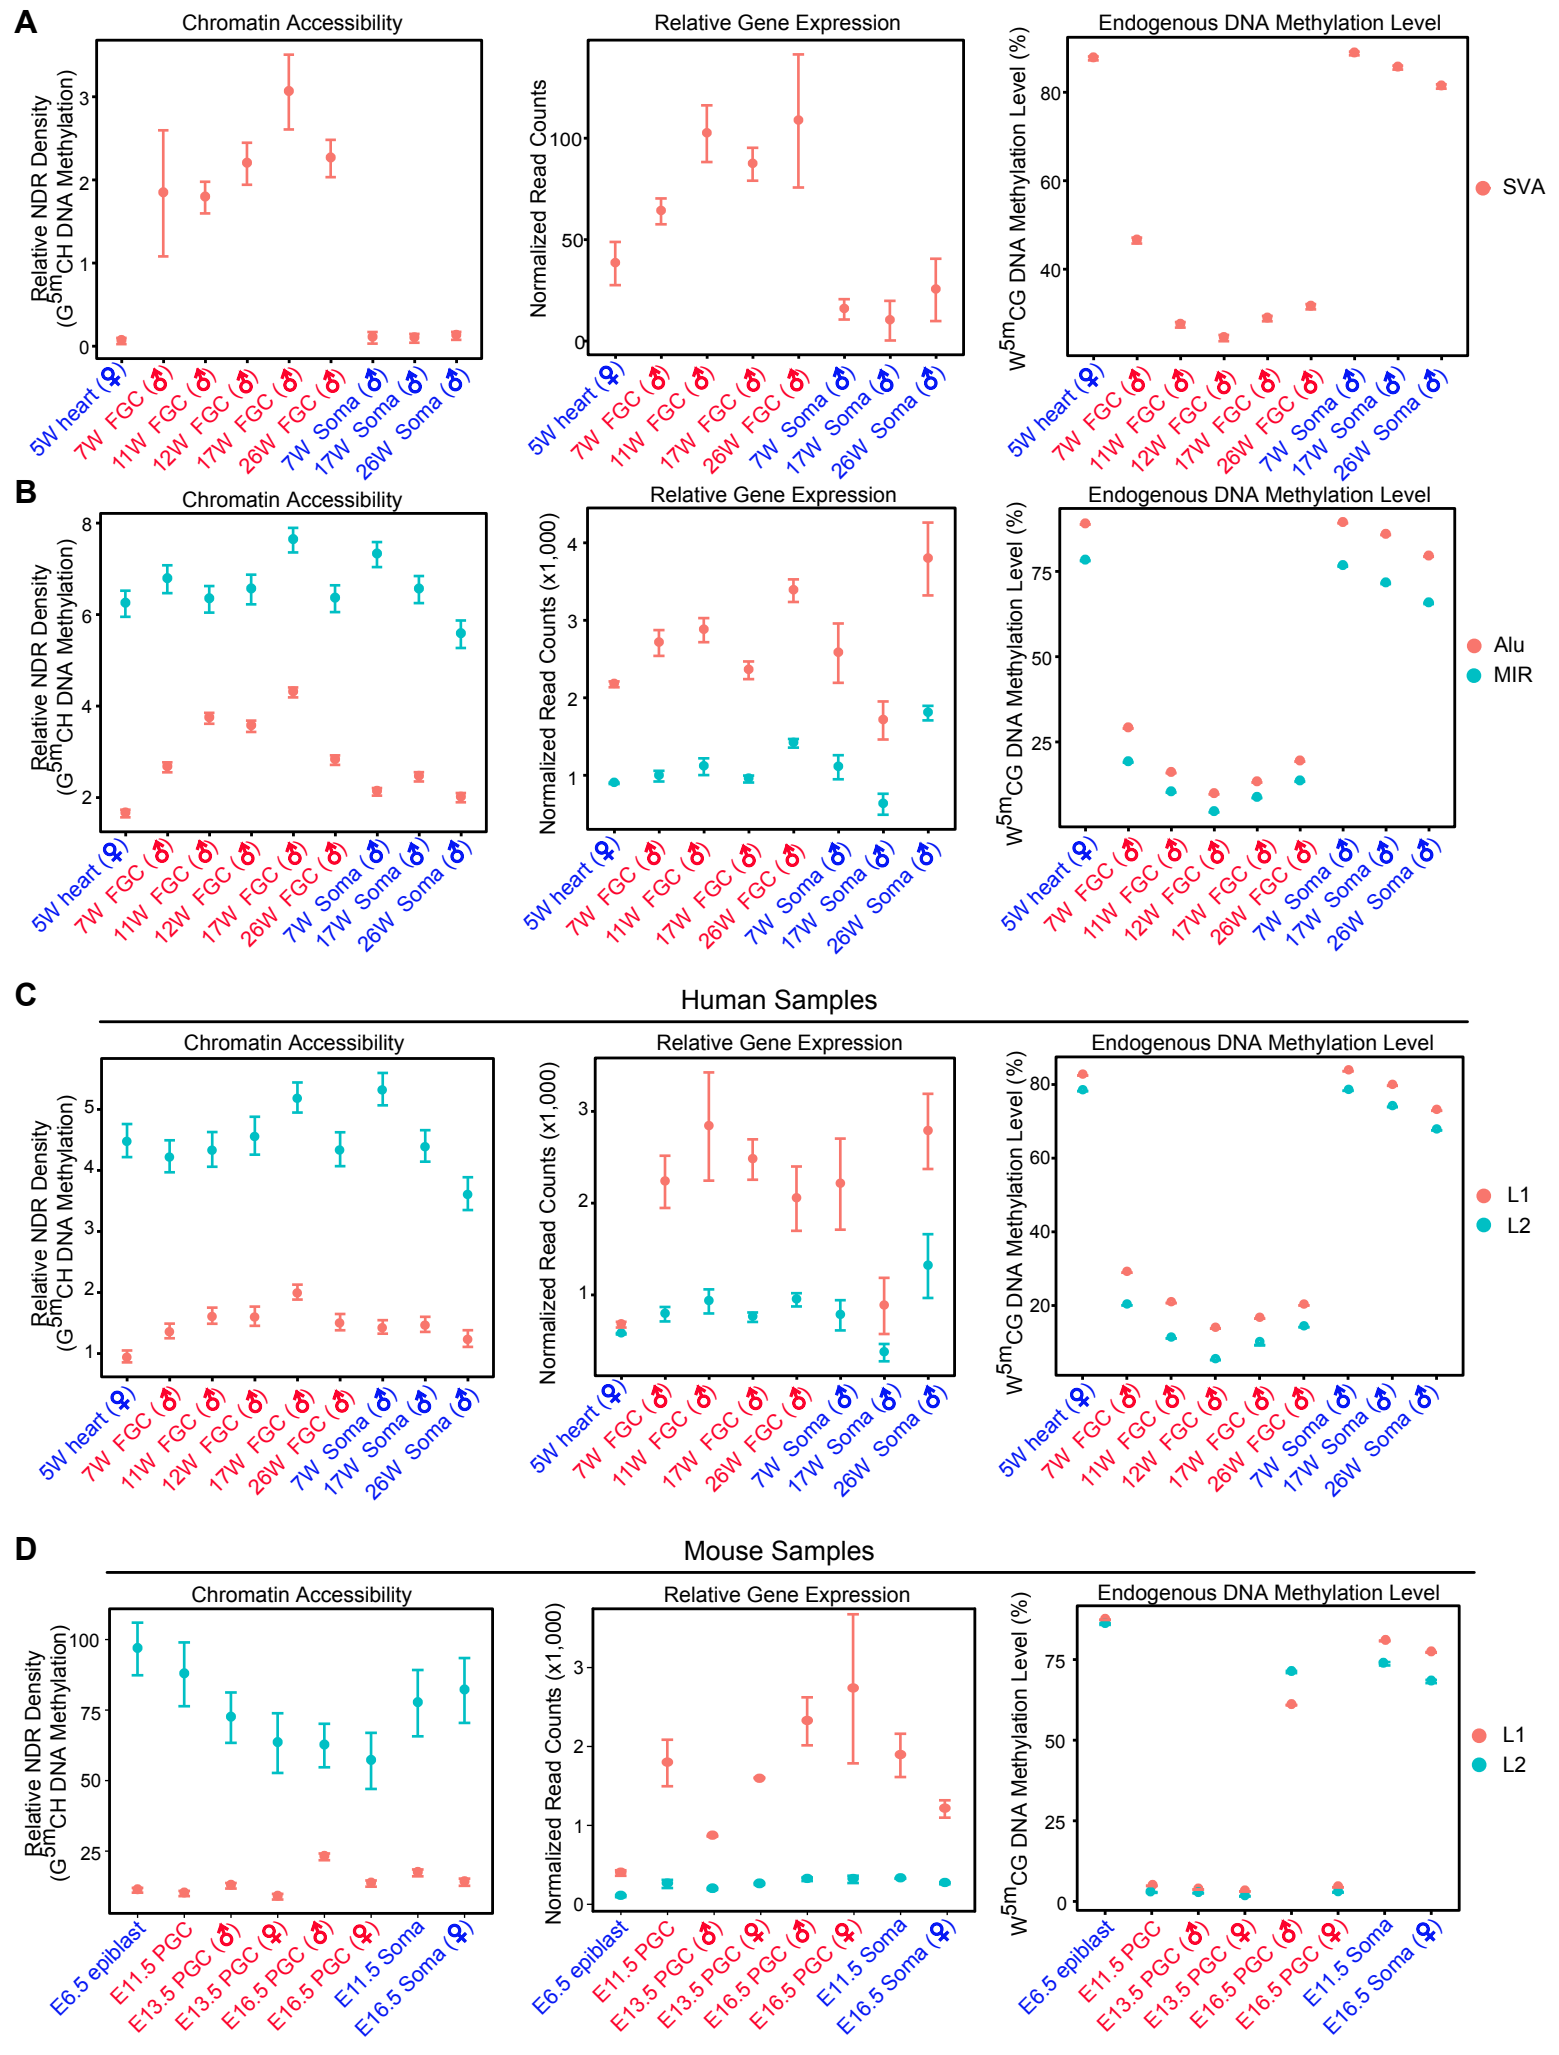

**Figure S8 The relationships among chromatin accessibility, endogenous DNA methylation and gene expression of repetitive elements.**

(A) The relationship among chromatin accessibility, gene expression and endogenous DNA methylation of SVA element in human PGCs. (B) The relationship among chromatin accessibility, gene expression and endogenous DNA methylation of Alu (red) and MIR (cyan) repeat in human PGCs. (C-D) The relationship among chromatin accessibility, gene expression and endogenous DNA methylation of L1 (red) and L2 (cyan) repeat in human (panel C) and mouse (panel D) PGCs.
