# Supplementary material for: DNA methylation and chromatin accessibility profiling of mouse and human fetal germ cells
Source: PubMed Central journal article supplement (PMC5339845; doi:10.1038/cr.2016.128), 2016-11-08
Supplement: cr2016128x12.pdf [file cr2016128x12.pdf]

**Figure S9****A**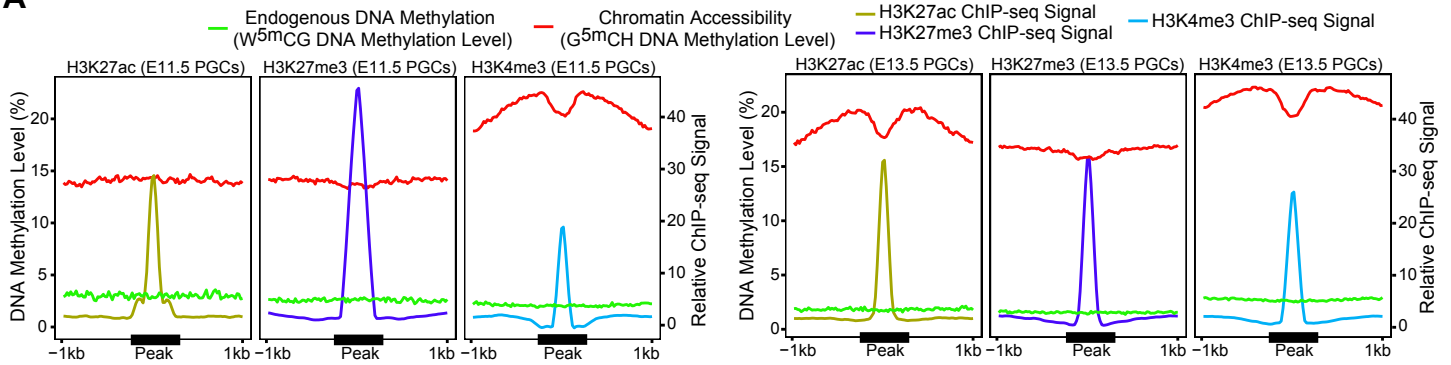**B**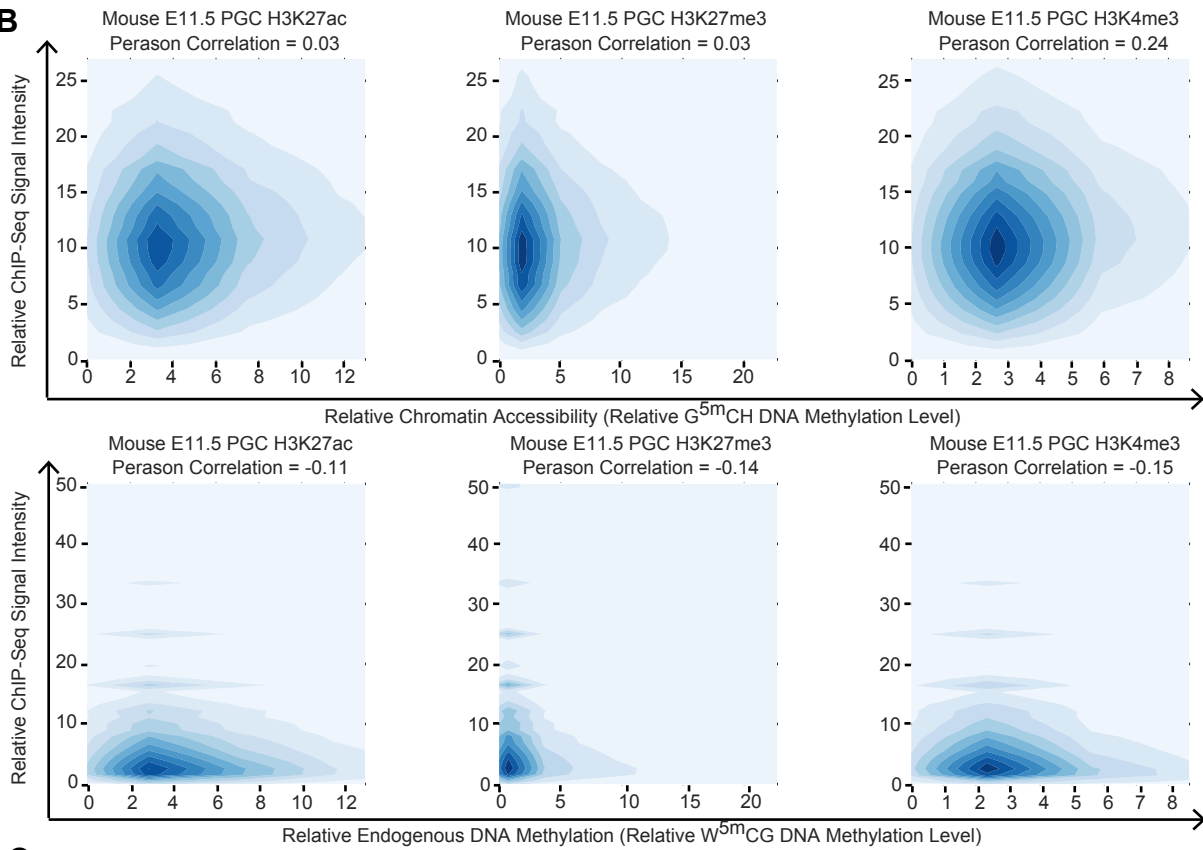**C**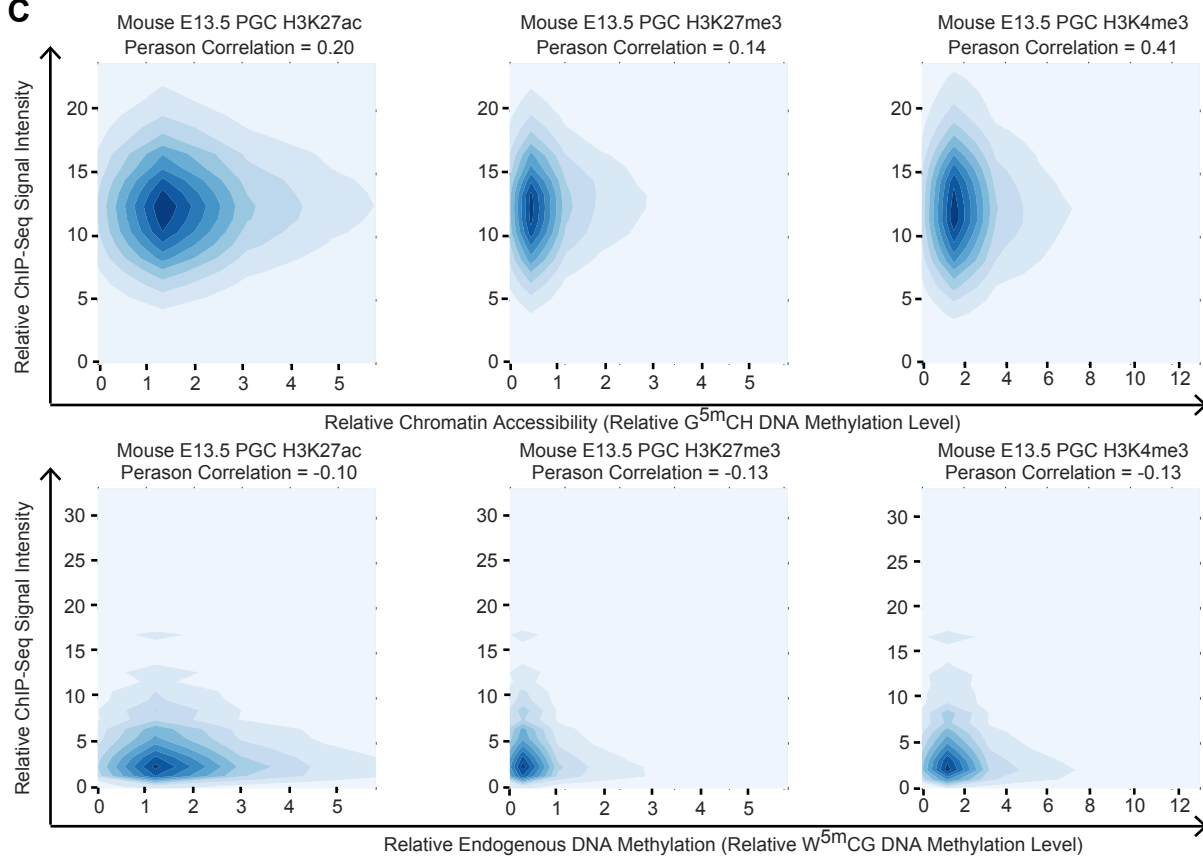

**Figure S9 The relationships between the histone modifications and the chromatin accessibilities in mouse PGCs.**

(A) The chromatin accessibility and endogenous DNA methylation level on the ChIP-seq peak and the flanking regions in mouse E11.5 and E13.5 PGCs. (B-C) The contour charts showing the person correlations between ChIP-seq signal of histone marks and the chromatin accessibility or endogenous DNA methylation in each consecutive 1kb bins in mouse E11.5 (panel B) and E13.5 (panel C) PGCs.
