# Supplementary material for: DNA methylation and chromatin accessibility profiling of mouse and human fetal germ cells
Source: PubMed Central journal article supplement (PMC5339845; doi:10.1038/cr.2016.128), 2016-11-08
Supplement: cr2016128x13.pdf [file cr2016128x13.pdf]

**Figure S10**

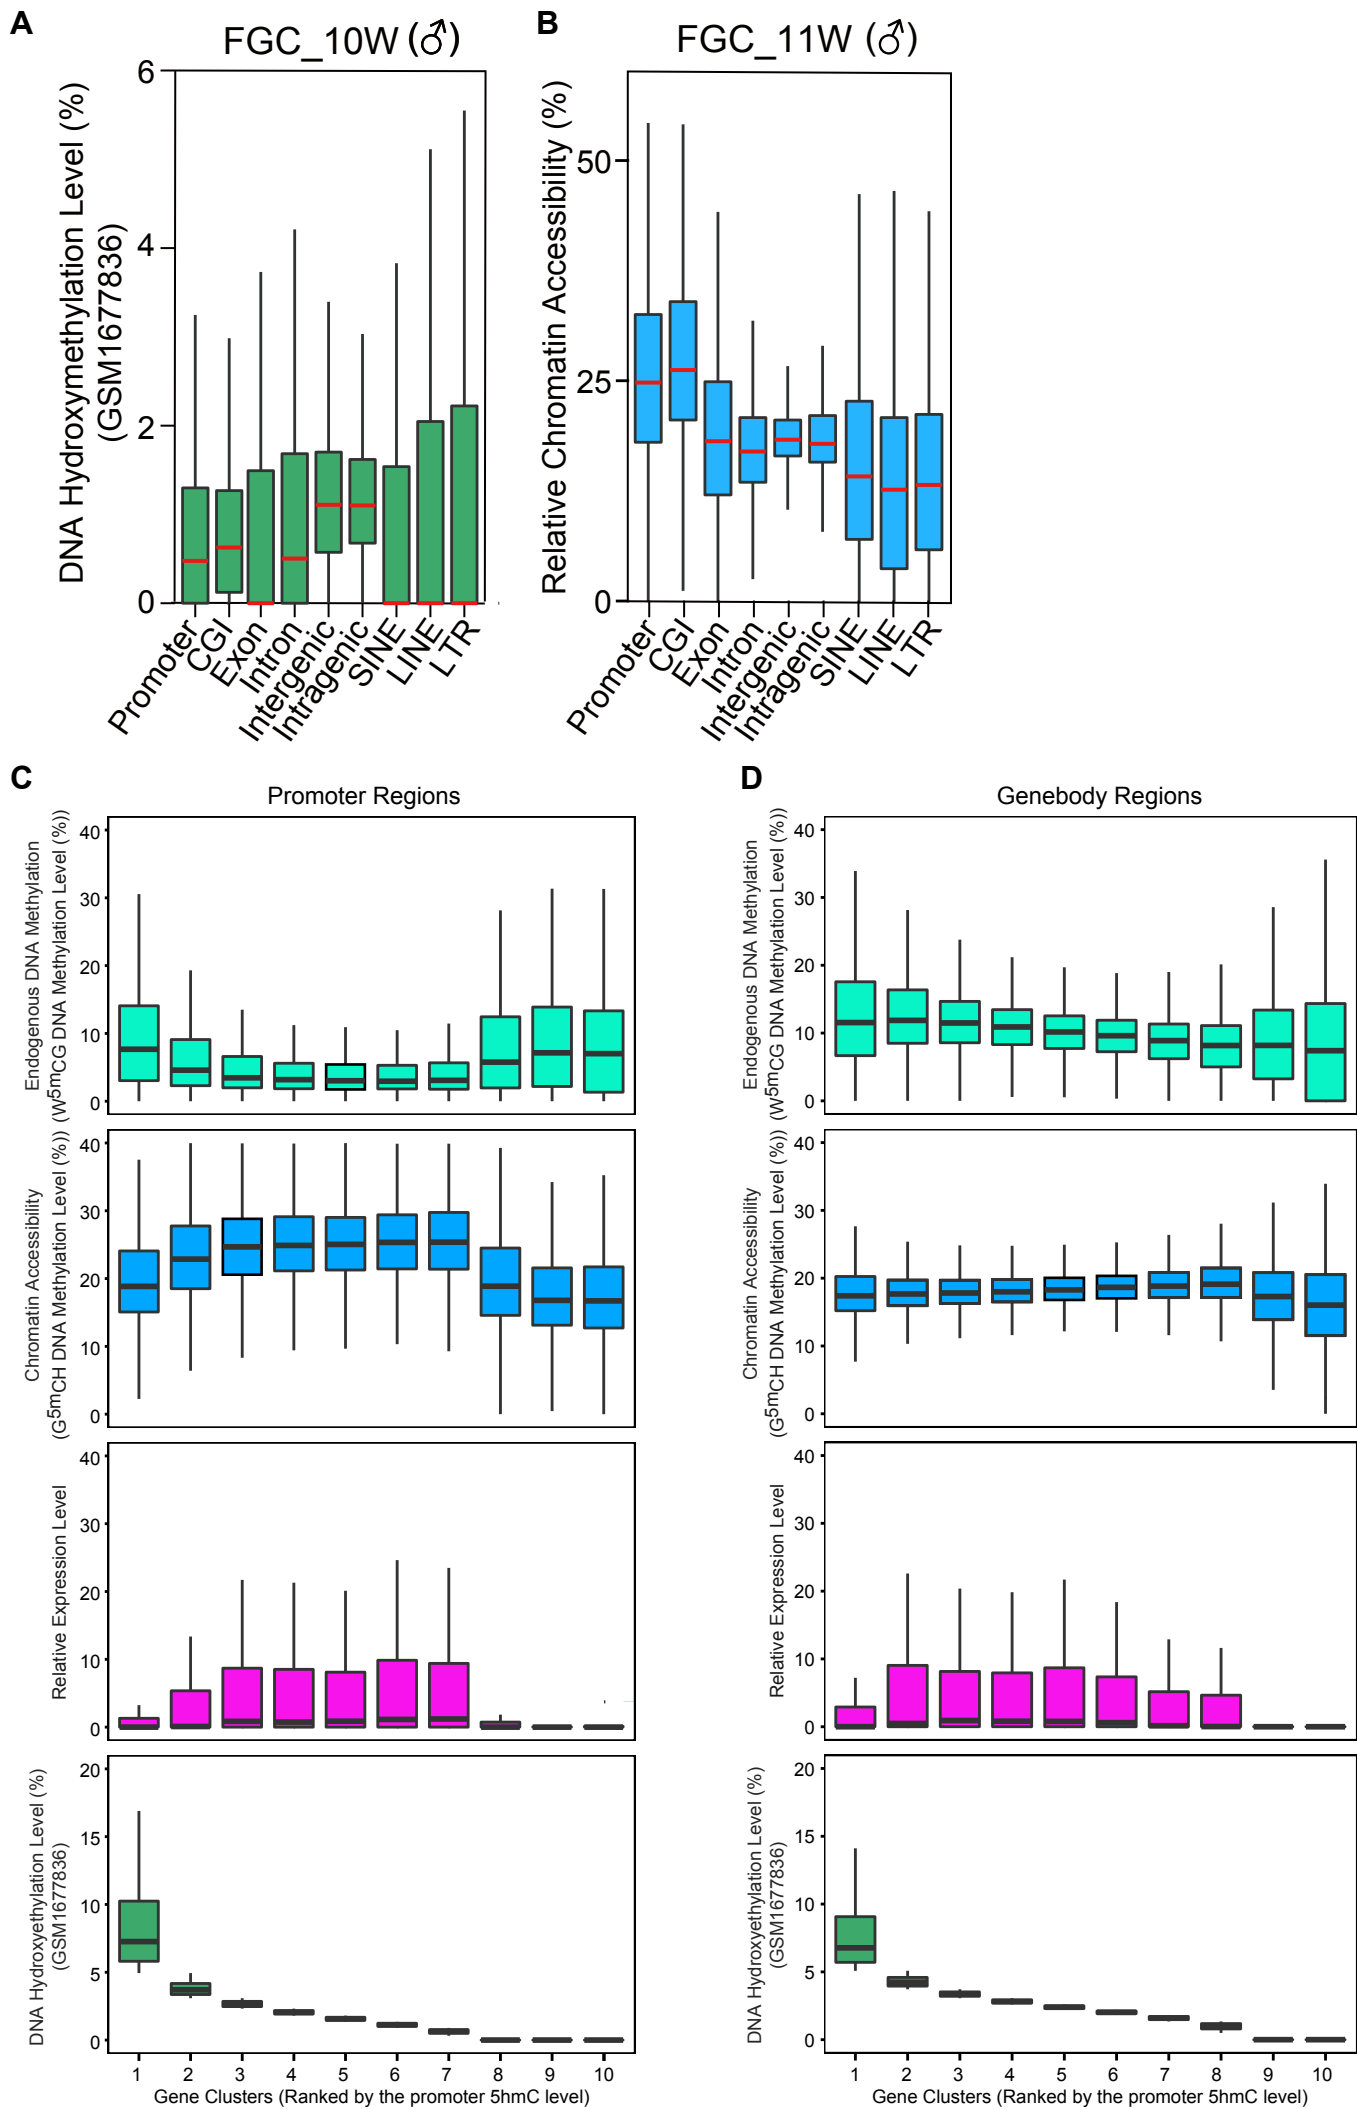

**Figure S10 The relationships between the DNA hydroxymethylation and the chromatin accessibility in human fetal germ cells.**

(A-B) The DNA hydroxymethylation levels (panel A) and the chromatin accessibilities (panel B) on annotated regions. (C-D) The relationships among the DNA hydroxymethylation, chromatin accessibility, endogenous DNA methylation and relative expression on gene promoter (panel C) and genebody (panel D) regions in human fetal germ cells.
