# Supplementary material for: DNA methylation and chromatin accessibility profiling of mouse and human fetal germ cells
Source: PubMed Central journal article supplement (PMC5339845; doi:10.1038/cr.2016.128), 2016-11-08
Supplement: cr2016128x14.pdf [file cr2016128x14.pdf]

**Figure S11****A**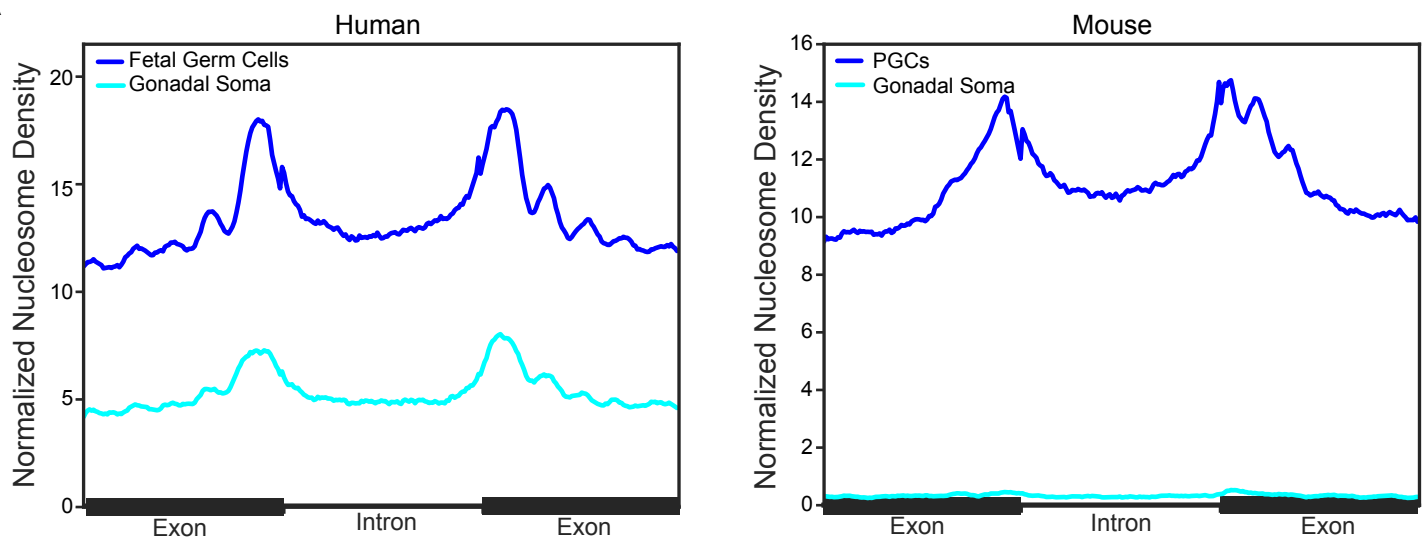**B**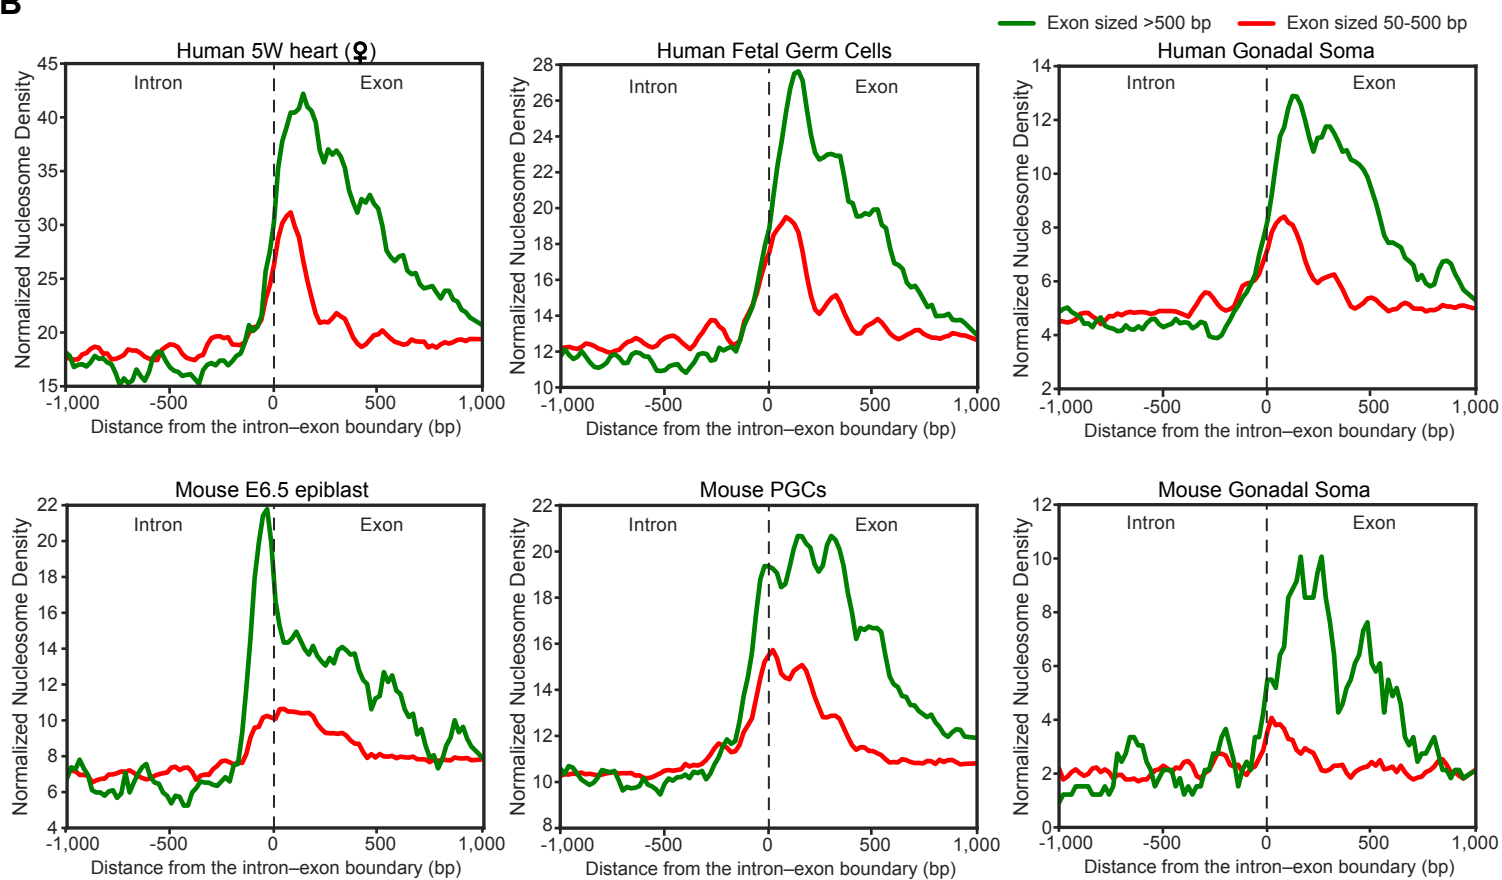

**Figure S11 The nucleosome patterning on the intron-exon boundary.**

(A) The nucleosome strongly positioned on the intron-exon boundary in mammalian germlines. (B) The nucleosome patterns on the intron-exon boundary in human and mouse samples with different exon sizes.
